# Supplementary material for: Classification of high‐grade cervical intraepithelial neoplasia by p16ink4a, Ki‐67, HPV E4 and FAM19A4/miR124‐2 methylation status demonstrates considerable heterogeneity with potential consequences for management
Source: PubMed Central journal article supplement — Int J Cancer. 2021 May 11;149(3):707–16. doi: 10.1002/ijc.33566 (PMC8252755; doi:10.1002/ijc.33566), 2021-05-11
Supplement: IJC-149-707-s001.pdf [file IJC-149-707-s001.pdf]

**Classification of high-grade CIN by p16<sup>ink4a</sup>, Ki-67, HPV E4 and *FAM19A4/miR124-2* methylation status demonstrates considerable heterogeneity with potential consequences for management**

*Supplementary material*

Frederique J. Vink\*, Stéfanie Dick\*, Daniëlle A.M. Heideman, Lise M.A. De Strooper, Renske D.M. Steenbergen, Birgit L.W. Lissenberg-Witte, DNTP group, Arno Floore, Jesper H. Bonde, Anja Oštrbenk Valenčak, Mario Poljak, Karl U. Petry †, Peter Hillemanns, Nienke E. van Trommel, Johannes Berkhof, Maaïke C.G. Bleeker, Chris J.L.M. Meijer

\* ) These authors contributed equally to this work

† Prof. Karl Ulrich Petry passed away on April 21<sup>st</sup>, 2020

*Table of contents*

|                        |        |
|------------------------|--------|
| Supplementary Table 1  | Page 2 |
| Supplementary Figure 1 | Page 3 |
| Supplementary Figure 2 | Page 4 |

**Supplementary Table 1.** Cohort information by participating centre

| Country of origin                       | the Netherlands                                                                |                                  | Denmark                                             | Slovenia                                                                                      | Germany                                                                                             |
|-----------------------------------------|--------------------------------------------------------------------------------|----------------------------------|-----------------------------------------------------|-----------------------------------------------------------------------------------------------|-----------------------------------------------------------------------------------------------------|
| <b>Laboratory of origin</b>             | Department of Pathology Amsterdam UMC, VU University Medical Center, Amsterdam |                                  | Department of Pathology, Hvidovre Hospital, Denmark | Institute of microbiology and Immunology, University of Ljubljana, Slovenia                   | Department of Obstetrics and Gynecology, Klinikum Wolfsburg, Germany                                |
| <b>Cohort origin</b>                    | POBASCAM study* <sup>31</sup>                                                  | VUSA-screen study* <sup>32</sup> | Routine national screening program                  | the Slovenian HPV prevalence study <sup>33</sup> and routine screening samples                | the Wolfsburg primary HPV screening project WOLPHSCREEN <sup>34</sup> and routine screening samples |
| <b>Number of included samples</b>       | 137                                                                            | 127                              | 116                                                 | 77                                                                                            | 40                                                                                                  |
| <b>Mean age in years (range)</b>        | 36.0 (29 - 55)                                                                 | 37.4 (29 - 60)                   | 32.6 (21 - 64)                                      | 35.6 (21 - 76)                                                                                | 33.3 (22 - 51)                                                                                      |
| <b>Cervical scrape collection</b>       | Screening samples that led to colposcopy referral                              |                                  |                                                     | Screening sample that led to colposcopy referral or additional sample taken before colposcopy |                                                                                                     |
| <b>Cervical scrape collection media</b> | PBS with 0.5% thiomersal                                                       | UCM                              | SurePath                                            | ThinPrep                                                                                      | ThinPrep                                                                                            |
| <b>DNA extraction platform</b>          | Hamilton Star Robot                                                            | Hamilton Star Robot              | MagNApure 96                                        | Biorobot EZ1 <sup>#</sup>                                                                     | Manual isolation                                                                                    |
| <b>DNA extraction kit</b>               | NucleoMag tissue                                                               | NucleoMag tissue                 | Roche DNA & VIRAL NA                                | QIAamp DNA mini <sup>#</sup>                                                                  | QIAamp DNA mini                                                                                     |
| <b>HPV assay</b>                        | GP5+/6+ PCR-enzyme immunoassay                                                 | HC2 (QIAGEN)                     | Onclarity (BD) and CLART HPV2 (Genomica)            | RealTime High Risk HPV Assay (Abbott)                                                         | HC2 (QIAGEN)                                                                                        |
| <b>Methylation test</b>                 | Prototype version of QIASure methylation test                                  | QIASure methylation test®        | QIASure methylation test®                           | QIASure methylation test®                                                                     | QIASure methylation test®                                                                           |

\* FFPE material from the POBASCAM and VUSA-screen trials was localized and retrieved from the local histopathological laboratories through the nationwide network and registry of histo- and cytopathology in the Netherlands (PALGA)<sup>30</sup>.

<sup>#</sup> Extraction was either done automatically with the Biorobot EZ1 (QIAGEN) or manually using the QIAamp DNA mini kit.

Abbreviations: PBS: Phosphate-Buffered Saline, UCM: Universal Collection Medium, HC2: Hybrid Capture 2

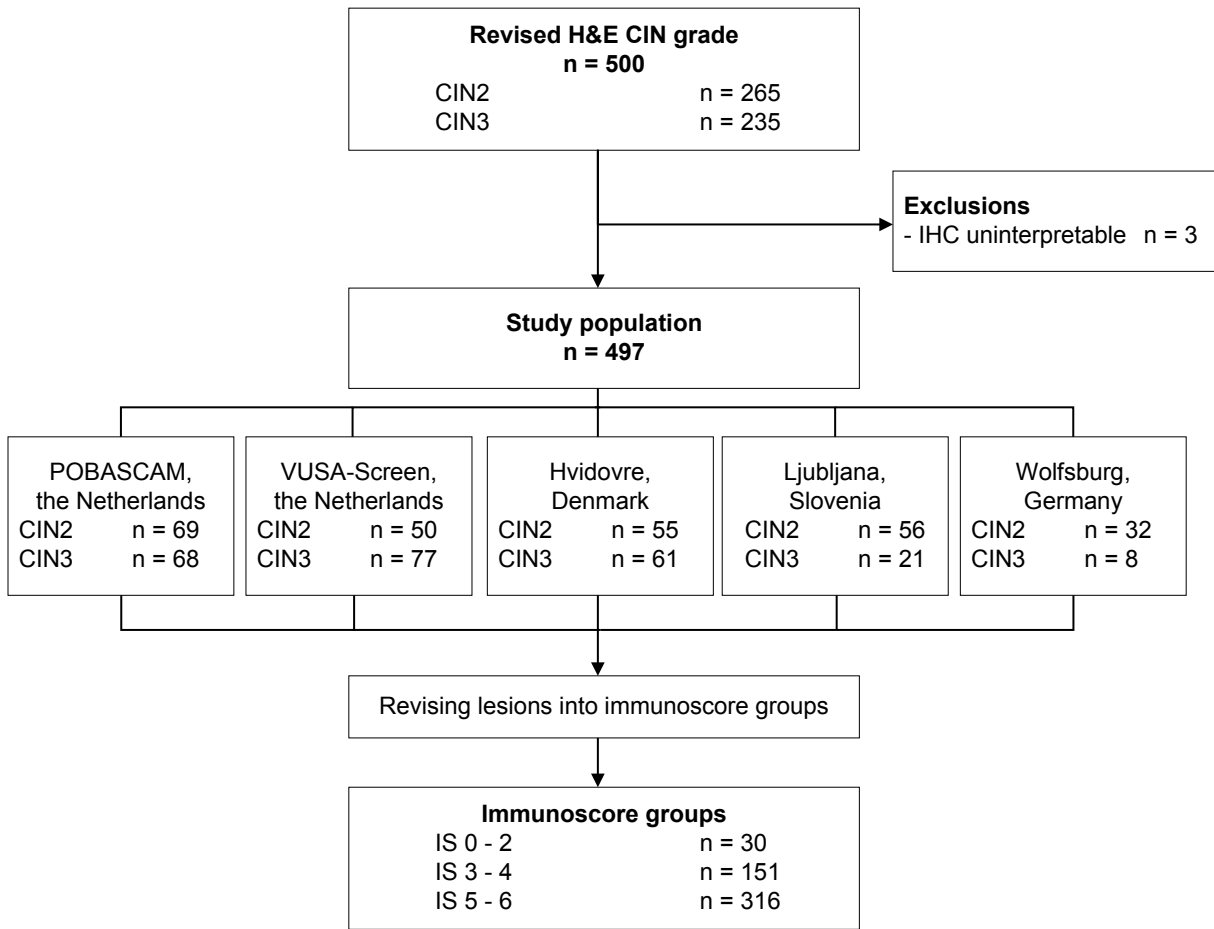

**Supplementary Figure 1.** Study flowchart. Abbreviations: CIN: cervical intraepithelial neoplasia, IHC: immunohistochemistry, FFPE: formalin-fixed paraffin embedded, H&E: haematoxylin-eosin, IS: immunosome.

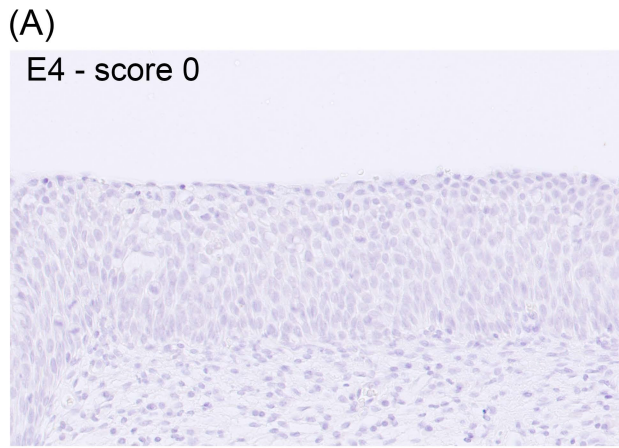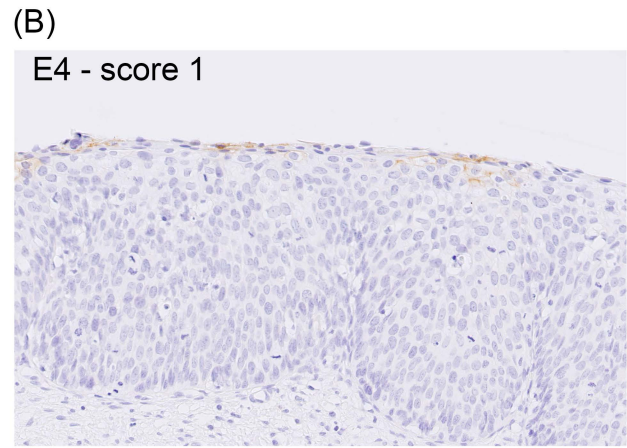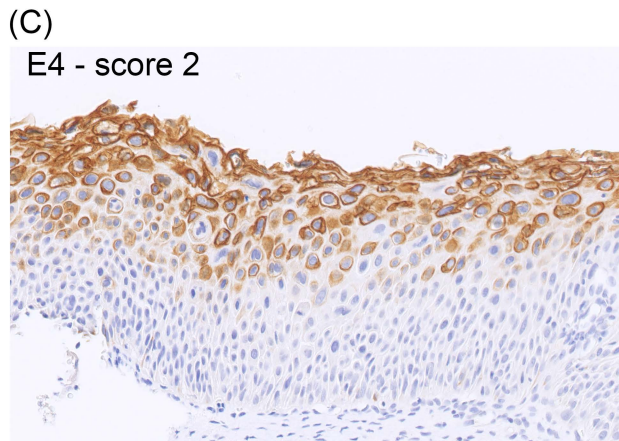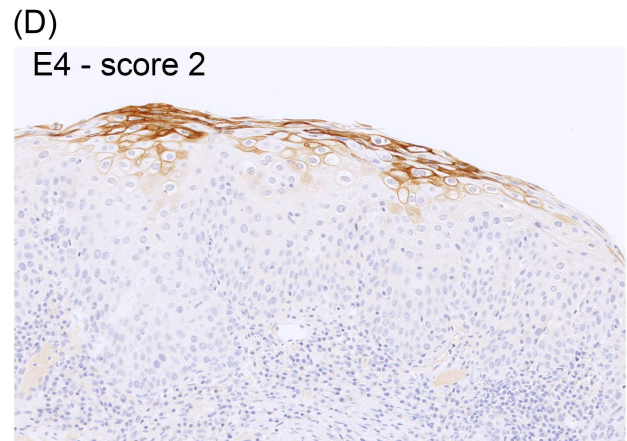

**Supplementary Figure 2.**

Scoring of HPV E4 immunostaining.

E4 staining is scored as negative staining (score 0) in (A), focally positive staining (limited staining of some cells restricted to the superficial layer of the epithelium, score 1) in (B), extensive widespread membranous and/or cytoplasmic staining in the superficial layers of the epithelium extending to half of the epithelial width, score 2) in a methylation-negative lesion in (C) and extensive mainly membranous staining in the superficial epithelial layers of a methylation-positive lesion in (D).
